# Supplementary material for: The relationship between endorsing reporting guidelines or trial registration and the impact factor or total citations in surgical journals
Source: PeerJ. 2022 Jan 25;10:e12837. doi: 10.7717/peerj.12837 (PMC8796708; doi:10.7717/peerj.12837)
Supplement: Supplemental Information 1 — All requirements are divided into “endorsed group” and not endorsed group and used to explore the requirements that may be associated with the Journal Impact Factor and Total Cites. [file peerj-10-12837-s001.xlsx]

## Sheet: 1
NO	JOURNAL_full	JOURNAL_abbr	ISSN	IF 2018	Log_IF	Total Cites 2018	Log_Total Cites	Journal size	region	start year	language	publisher	ICMJE	EQUATOR	CONSORT	PRISMA	ARRIVE	STARD	MOOSE	STROBE	CARE	COREQ	CHEERS	SPIRIT	PRISMAP	TRIPOD	SQUIRE	SRQR	RIGHT	AGREE	COI	RCTs registration	SRs/MAs registration
1	JAMA Surgery	JAMA SURG	2168-6254	10.668	1.028	6432	3.808	123	0	2013	0	5	1	1	1	0	0	1	1	1	0	0	1	0	0	0	0	0	0	0	1	1	0
2	ANNALS OF SURGERY	ANN SURG	0003-4932	9.476	0.977	50355	4.702	309	0	1885	0	3	1	0	1	1	0	0	1	1	0	0	0	0	0	0	0	0	0	0	1	1	0
3	JOURNAL OF HEART AND LUNG TRANSPLANTATION	J HEART LUNG TRANSPL	1053-2498	8.578	0.933	12436	4.095	146	0	1991	0	1	1	0	0	0	0	0	0	1	0	0	0	0	0	0	0	0	0	0	1	1	0
4	JOURNAL OF NEUROLOGY NEUROSURGERY AND PSYCHIATRY	J NEUROL NEUROSUR PS	0022-3050	8.327	0.92	29660	4.472	162	2	1944	0	5	0	0	0	0	0	0	0	0	0	0	0	0	0	0	0	0	0	0	0	0	0
5	AMERICAN JOURNAL OF TRANSPLANTATION	AM J TRANSPLANT	1600-6135	7.163	0.855	24285	4.385	292	1	2001	0	4	1	1	1	0	0	1	0	0	0	1	0	0	0	0	0	0	0	0	1	1	0
6	ENDOSCOPY	ENDOSCOPY	0013-726X	6.381	0.805	10604	4.025	99	1	1969	0	5	1	0	0	0	0	0	0	0	0	0	0	0	0	0	0	0	0	0	1	1	0
7	AMERICAN JOURNAL OF SURGICAL PATHOLOGY	AM J SURG PATHOL	0147-5185	6.155	0.789	21132	4.325	194	0	1977	0	3	1	0	0	0	0	0	0	0	0	0	0	0	0	0	0	0	0	0	1	0	0
8	BRITISH JOURNAL OF SURGERY	BRIT J SURG	0007-1323	5.572	0.746	23178	4.365	206	2	1913	0	4	1	1	1	1	0	0	0	1	0	0	0	0	0	0	0	0	0	0	1	1	0
9	JOURNAL OF THORACIC AND CARDIOVASCULAR SURGERY	J THORAC CARDIOV SUR	0022-5223	5.261	0.721	29599	4.471	388	0	1959	0	1	1	0	1	0	0	0	0	0	0	0	0	0	0	0	0	0	0	0	1	1	0
10	TRANSPLANTATION	TRANSPLANTATION	0041-1337	4.743	0.676	24971	4.397	339	0	1963	0	3	1	0	1	1	1	1	0	1	0	1	0	0	0	0	0	0	0	0	1	1	0
11	JOURNAL OF BONE AND JOINT SURGERY-AMERICAN VOLUME	J BONE JOINT SURG AM	0021-9355	4.716	0.674	46190	4.665	304	0	1919	0	3	1	0	1	1	0	0	0	1	0	0	0	0	0	0	0	0	0	0	1	1	0
12	NEUROSURGERY	NEUROSURGERY	0148-396X	4.605	0.663	29096	4.464	254	0	1977	0	5	1	1	1	1	0	1	1	1	0	0	0	0	0	0	0	0	0	0	0	1	0
13	JOURNAL OF THE AMERICAN COLLEGE OF SURGEONS	J AM COLL SURGEONS	1072-7515	4.45	0.648	16806	4.225	184	0	1905	0	1	1	0	1	0	1	0	0	0	0	0	0	0	0	0	0	0	0	0	1	0	0
14	ARTHROSCOPY-THE JOURNAL OF ARTHROSCOPIC AND RELATED SURGERY	ARTHROSCOPY	0749-8063	4.433	0.647	17057	4.232	315	0	1985	0	1	1	0	1	1	0	0	0	0	0	0	0	0	0	0	0	0	0	0	0	1	1
15	Bone & Joint Journal	BONE JOINT J	2049-4394	4.301	0.634	5865	3.768	236	2	2013	0	5	1	0	0	0	1	0	0	0	0	0	0	0	0	0	0	0	0	0	1	1	0
16	LIVER TRANSPLANTATION	LIVER TRANSPLANT	1527-6465	4.159	0.619	10513	4.022	136	0	2000	0	4	0	0	1	0	0	0	0	0	0	0	0	0	0	0	0	0	0	0	1	0	0
17	CLINICAL ORTHOPAEDICS AND RELATED RESEARCH	CLIN ORTHOP RELAT R	0009-921X	4.154	0.618	38592	4.586	194	0	1963	0	3	1	0	1	1	0	0	0	1	0	0	0	0	0	0	0	0	0	0	1	0	0
18	JOURNAL OF NEUROSURGERY	J NEUROSURG	0022-3085	4.13	0.616	36001	4.556	414	0	1944	0	5	0	0	0	0	0	0	0	0	0	0	0	0	0	0	0	0	0	0	0	0	0
19	DISEASES OF THE COLON & RECTUM	DIS COLON RECTUM	0012-3706	4.087	0.611	13467	4.129	168	0	1958	0	3	1	1	1	1	0	0	1	1	0	0	0	0	0	0	0	0	0	0	1	1	0
20	PLASTIC AND RECONSTRUCTIVE SURGERY	PLAST RECONSTR SURG	0032-1052	3.946	0.596	35448	4.55	494	0	1958	0	3	1	0	0	0	0	0	0	0	0	0	0	0	0	0	0	0	0	0	0	1	0
21	Journal of NeuroInterventional Surgery	J NEUROINTERV SURG	1759-8478	3.925	0.594	4407	3.644	258	2	2009	0	5	0	1	1	0	0	0	0	0	0	0	0	0	0	0	0	0	0	0	1	0	0
22	ANNALS OF THORACIC SURGERY	ANN THORAC SURG	0003-4975	3.919	0.593	36145	4.558	485	0	1965	0	1	1	0	1	1	0	0	0	0	0	0	0	0	0	0	0	0	0	0	1	1	0
23	EUROPEAN JOURNAL OF CARDIO-THORACIC SURGERY	EUR J CARDIO-THORAC	1010-7940	3.847	0.585	17156	4.234	321	1	1987	0	5	1	1	1	1	0	1	1	1	0	0	0	0	0	0	0	0	0	0	1	1	0
24	World Journal of Emergency Surgery	WORLD J EMERG SURG	1749-7922	3.798	0.58	1217	3.085	54	2	2006	0	5	1	1	1	1	1	1	0	1	1	1	1	1	1	1	0	0	0	0	1	1	1
25	Surgery for Obesity and Related Diseases	SURG OBES RELAT DIS	1550-7289	3.758	0.575	6229	3.794	227	0	2005	0	1	0	0	0	0	0	0	0	0	0	0	0	0	0	0	0	0	0	0	1	0	0
26	ANNALS OF SURGICAL ONCOLOGY	ANN SURG ONCOL	1068-9265	3.681	0.566	28017	4.447	484	0	1994	0	2	1	1	1	1	0	0	0	0	0	0	0	0	0	0	0	0	0	0	1	0	0
27	EUROPEAN JOURNAL OF VASCULAR AND ENDOVASCULAR SURGERY	EUR J VASC ENDOVASC	1078-5884	3.642	0.561	9293	3.968	160	2	1995	0	5	1	0	1	1	1	0	0	1	0	0	0	0	0	0	0	0	0	0	1	1	0
28	Digestive Endoscopy	DIGEST ENDOSC	0915-5635	3.64	0.561	2548	3.406	71	3	1989	0	4	1	0	1	0	0	0	0	0	0	0	0	0	0	0	0	0	0	0	1	1	0
29	OBESITY SURGERY	OBES SURG	0960-8923	3.603	0.557	12860	4.109	501	0	1991	0	2	1	1	1	1	0	1	0	1	0	0	0	0	0	0	0	0	0	0	1	1	0
30	TRANSPLANT INTERNATIONAL	TRANSPL INT	0934-0874	3.526	0.547	4868	3.687	110	1	1989	0	4	1	0	1	1	0	0	1	1	0	0	0	0	0	0	0	0	0	0	1	1	0
31	JAMA Otolaryngology-Head & Neck Surgery	JAMA OTOLARYNGOL	2168-6181	3.502	0.544	2855	3.456	122	0	2013	0	5	1	1	1	1	0	1	1	1	0	1	1	1	0	1	1	1	0	0	1	1	0
32	Aesthetic Surgery Journal	AESTHET SURG J	1090-820X	3.48	0.542	3384	3.529	143	0	1997	0	5	1	0	0	0	0	0	0	0	0	0	0	0	0	0	0	0	0	0	1	1	0
33	SURGERY	SURGERY	0039-6060	3.476	0.541	19969	4.3	393	0	1937	0	1	1	0	0	1	0	0	0	0	0	0	0	0	0	0	0	0	0	0	1	1	0
34	EJSO	EJSO-EUR J SURG ONC	0748-7983	3.379	0.529	8540	3.931	262	2	1985	0	1	0	0	0	1	0	0	0	0	0	0	0	0	0	0	0	0	0	0	1	0	0
35	Journal of Trauma and Acute Care Surgery	J TRAUMA ACUTE CARE	2163-0755	3.377	0.529	8770	3.943	311	0	2012	0	3	1	1	1	1	0	1	0	1	0	0	0	0	0	0	0	0	0	0	1	1	1
36	LASERS IN SURGERY AND MEDICINE	LASER SURG MED	0196-8092	3.262	0.513	5244	3.72	108	0	1980	0	4	1	1	1	1	1	1	0	1	1	1	1	1	1	1	0	0	0	0	1	0	0
37	JOURNAL OF VASCULAR SURGERY	J VASC SURG	0741-5214	3.243	0.511	26542	4.424	432	0	1984	0	1	1	1	1	1	0	0	0	1	0	0	0	0	0	0	0	0	0	0	1	1	0
38	SURGICAL ENDOSCOPY AND OTHER INTERVENTIONAL TECHNIQUES	SURG ENDOSC	0930-2794	3.209	0.506	22118	4.345	624	0	1987	0	2	1	1	1	1	0	1	0	1	0	0	0	0	0	0	0	0	0	0	1	1	0
39	International Journal of Surgery	INT J SURG	1743-9191	3.158	0.499	7645	3.883	395	2	2003	0	1	0	1	1	1	0	1	0	0	0	1	1	0	0	0	1	0	0	0	1	1	0
40	KNEE SURGERY SPORTS TRAUMATOLOGY ARTHROSCOPY	KNEE SURG SPORT TR A	0942-2056	3.149	0.498	14500	4.161	461	1	1993	0	2	1	1	1	1	1	1	0	1	1	1	1	1	1	1	1	1	1	1	1	1	0
41	JOURNAL OF SURGICAL ONCOLOGY	J SURG ONCOL	0022-4790	3.114	0.493	10395	4.017	380	0	1969	0	4	1	0	0	0	0	0	0	0	0	0	0	0	0	0	0	0	0	0	1	0	0
42	SHOCK	SHOCK	1073-2322	3.083	0.489	7638	3.883	183	0	1994	0	3	1	0	0	0	0	0	0	0	0	0	0	0	0	0	0	0	0	0	1	0	0
43	JAMA Facial Plastic Surgery	JAMA FACIAL PLAST SU	2168-6076	3.056	0.485	936	2.971	57	0	2013	0	5	1	1	0	1	0	0	0	0	0	0	0	0	0	0	0	0	0	0	1	0	0
44	HPB	HPB	1365-182X	3.047	0.484	4334	3.637	156	2	1999	0	1	1	0	1	1	1	0	0	0	0	0	0	0	0	0	0	0	0	0	1	1	0
45	JOURNAL OF REFRACTIVE SURGERY	J REFRACT SURG	1081-597X	3	0.477	4486	3.652	110	0	1995	0	5	1	0	0	0	0	0	0	0	0	0	0	0	0	0	0	0	0	0	1	1	0
46	SURGICAL ONCOLOGY-OXFORD	SURG ONCOL	0960-7404	3	0.477	1918	3.283	119	2	1992	0	1	1	0	1	0	0	0	0	0	0	0	0	0	0	0	0	0	0	0	1	1	0
47	JOURNAL OF NEUROSURGERY-SPINE	J NEUROSURG-SPINE	1547-5654	2.998	0.477	7809	3.893	186	0	2004	0	5	0	0	0	0	0	0	0	0	0	0	0	0	0	0	0	0	0	0	0	0	0
48	Colorectal Disease	COLORECTAL DIS	1462-8910	2.997	0.477	6561	3.817	170	2	1999	0	4	1	0	1	0	0	0	0	1	0	0	0	1	0	0	0	0	0	0	1	1	1
49	JOURNAL OF ENDOVASCULAR THERAPY	J ENDOVASC THER	1526-6028	2.986	0.475	3499	3.544	93	0	2000	0	5	1	0	0	0	0	0	0	0	0	0	0	0	0	0	0	0	0	0	1	0	0
50	JOURNAL OF NEUROSURGICAL ANESTHESIOLOGY	J NEUROSURG ANESTH	0898-4921	2.957	0.471	1495	3.175	37	0	1989	0	3	1	1	1	1	0	0	0	1	0	0	0	0	0	0	0	0	0	0	1	1	1
51	Neurosurgical Focus	NEUROSURG FOCUS	1092-0684	2.891	0.461	7349	3.866	156	0	1996	0	5	0	0	0	0	0	0	0	0	0	0	0	0	0	0	0	0	0	0	0	0	0
52	JOURNAL OF SHOULDER AND ELBOW SURGERY	J SHOULDER ELB SURG	1058-2746	2.865	0.457	13446	4.129	365	0	1992	0	1	1	0	1	1	0	0	0	1	0	0	0	0	0	0	0	0	0	0	1	0	0
53	WOUND REPAIR AND REGENERATION	WOUND REPAIR REGEN	1067-1927	2.85	0.455	5808	3.764	52	0	1993	0	4	1	0	0	0	0	0	0	0	0	0	0	0	0	0	0	0	0	0	1	1	0
54	WORLD JOURNAL OF SURGERY	WORLD J SURG	0364-2313	2.768	0.442	16879	4.227	485	0	1977	0	2	1	1	1	1	0	1	0	1	0	0	0	0	0	0	0	0	0	0	1	1	0
55	Journal of Vascular Surgery-Venous and Lymphatic Disorders	J VASC SURG-VENOUS L	2213-333X	2.696	0.431	791	2.898	60	2	2013	0	1	1	1	1	1	0	0	0	1	0	0	0	0	0	0	0	0	0	0	1	1	0
56	JOURNAL OF GASTROINTESTINAL SURGERY	J GASTROINTEST SURG	1091-255X	2.686	0.429	10333	4.014	253	0	1997	0	2	1	1	1	1	0	1	0	1	0	0	0	0	0	0	0	0	0	0	1	1	0
57	INTERNATIONAL JOURNAL OF COLORECTAL DISEASE	INT J COLORECTAL DIS	0179-1958	2.641	0.422	5806	3.764	225	1	1986	0	2	1	1	1	1	1	1	0	1	1	1	1	1	1	1	1	1	0	0	1	1	0
58	Techniques in Coloproctology	TECH COLOPROCTOL	1123-6337	2.635	0.421	1957	3.292	111	1	1993	0	2	1	1	1	1	1	1	0	1	1	1	1	1	1	1	1	1	0	0	1	1	0
59	NEUROSURGERY CLINICS OF NORTH AMERICA	NEUROSURG CLIN N AM	1042-3680	2.553	0.407	1637	3.214	59	0	1989	0	1	1	0	0	0	0	0	0	0	0	0	0	0	0	0	0	0	0	0	1	0	0
60	NEUROSURGICAL REVIEW	NEUROSURG REV	0344-5607	2.532	0.403	2434	3.386	113	1	1978	0	2	1	1	1	1	0	1	0	1	0	0	0	0	0	0	0	0	0	0	1	1	0
61	Seminars in Pediatric Surgery	SEMIN PEDIATR SURG	1055-8586	2.462	0.391	1604	3.205	55	0	1992	0	1	1	0	0	0	0	0	0	1	0	0	0	0	0	0	0	0	0	0	1	1	0
62	HEAD AND NECK-JOURNAL FOR THE SCIENCES AND SPECIALTIES OF THE HEAD AND NECK	HEAD NECK-J SCI SPEC	1043-3074	2.442	0.388	11100	4.045	315	0	1989	0	4	0	0	0	0	0	0	0	0	0	0	0	0	0	0	0	0	0	0	1	0	0
63	Journal of Visceral Surgery	J VISC SURG	1878-7886	2.393	0.379	735	2.866	46	1	2010	0	1	1	0	0	0	0	0	0	0	0	0	0	0	0	0	0	0	0	0	1	0	0
64	International Wound Journal	INT WOUND J	1742-4801	2.385	0.377	2906	3.463	118	2	2004	0	4	0	0	0	0	0	0	0	0	0	0	0	0	0	0	0	0	0	0	1	0	0
65	Journal of Hepato-Biliary-Pancreatic Sciences	J HEPATO-BIL-PAN SCI	1868-6974	2.353	0.372	3791	3.579	52	3	1993	0	4	1	0	0	0	0	0	0	0	0	0	0	0	0	0	0	0	0	0	1	1	0
66	JOURNAL OF THE AMERICAN ACADEMY OF ORTHOPAEDIC SURGEONS	J AM ACAD ORTHOP SUR	1067-151X	2.348	0.371	5593	3.748	151	0	1993	0	3	1	0	0	0	0	0	0	0	0	0	0	0	0	0	0	0	0	0	0	1	0
67	Surgical Oncology Clinics of North America	SURG ONCOL CLIN N AM	1055-3207	2.34	0.369	1172	3.069	49	0	1992	0	1	1	0	0	0	0	0	0	0	0	0	0	0	0	0	0	0	0	0	1	0	0
68	OTOLARYNGOLOGY-HEAD AND NECK SURGERY	OTOLARYNG HEAD NECK	0194-5998	2.31	0.364	13643	4.135	300	0	1981	0	5	1	0	0	0	0	0	0	0	0	0	0	0	0	0	0	0	0	0	1	0	0
69	CANADIAN JOURNAL OF SURGERY	CAN J SURG	0008-428X	2.306	0.363	2681	3.428	64	0	1957	1	5	1	0	0	0	0	0	0	0	0	0	0	0	0	0	0	0	0	0	1	1	0
70	Hernia	HERNIA	1265-4906	2.288	0.359	3860	3.587	100	1	1997	0	2	1	1	1	1	1	1	0	1	1	1	1	1	1	1	1	1	1	1	1	1	0
71	BURNS	BURNS	0305-4179	2.247	0.352	7923	3.899	228	2	1974	0	1	1	0	1	0	1	0	0	0	0	0	0	0	0	0	0	0	0	0	1	0	0
72	JOURNAL OF CATARACT AND REFRACTIVE SURGERY	J CATARACT REFR SURG	0886-3350	2.238	0.35	12673	4.103	101	0	1986	0	1	1	0	0	0	0	0	0	0	0	0	0	0	0	0	0	0	0	0	1	1	0
73	Journal of Plastic Reconstructive and Aesthetic Surgery	J PLAST RECONSTR AES	1748-6815	2.228	0.348	6277	3.798	195	2	2006	0	1	1	0	1	1	0	1	0	1	0	0	0	0	0	0	0	0	0	0	1	1	0
74	Journal of Hand Surgery-European Volume	J HAND SURG-EUR VOL	1753-1934	2.225	0.347	4595	3.662	132	2	1969	0	5	1	0	1	0	0	0	0	0	0	0	0	0	0	0	0	0	0	0	1	1	0
75	Journal of Surgical Education	J SURG EDUC	1931-7204	2.209	0.344	2728	3.436	223	0	2007	0	1	0	0	0	0	0	0	0	0	0	0	0	0	0	0	0	0	0	0	1	0	0
76	AMERICAN JOURNAL OF SURGERY	AM J SURG	0002-9610	2.201	0.343	17612	4.246	383	0	1904	0	1	0	0	0	0	0	0	0	0	0	0	0	0	0	0	0	0	0	0	1	0	0
77	DERMATOLOGIC SURGERY	DERMATOL SURG	1076-0512	2.19	0.34	7360	3.867	162	0	1975	0	3	1	0	0	0	0	0	0	0	0	0	0	0	0	0	0	0	0	0	1	0	0
78	Journal of Neurosurgery-Pediatrics	J NEUROSURG-PEDIATR	1933-0707	2.17	0.336	4167	3.62	185	0	2008	0	5	0	0	0	0	0	0	0	0	0	0	0	0	0	0	0	0	0	0	0	0	0
79	International Journal of Computer Assisted Radiology and Surgery	INT J COMPUT ASS RAD	1861-6410	2.155	0.333	2416	3.383	180	1	2006	0	2	1	1	1	1	1	1	0	1	1	1	1	1	1	1	1	1	1	1	1	1	0
80	LANGENBECKS ARCHIVES OF SURGERY	LANGENBECK ARCH SURG	1435-2443	2.093	0.321	3748	3.574	104	1	1998	0	2	1	1	1	1	1	1	0	1	1	1	1	1	1	1	1	1	1	1	1	1	0
81	JOURNAL OF PEDIATRIC SURGERY	J PEDIATR SURG	0022-3468	2.092	0.321	17032	4.231	468	0	1966	0	1	0	0	0	0	0	0	0	0	0	0	0	0	0	0	0	0	0	0	1	0	0
82	JOURNAL OF HAND SURGERY-AMERICAN VOLUME	J HAND SURG-AM	0363-5023	2.09	0.32	11735	4.069	241	0	1984	0	1	0	0	0	0	0	0	0	0	0	0	0	0	0	0	0	0	0	0	1	0	0
83	SURGERY TODAY	SURG TODAY	0941-1291	2.077	0.317	4549	3.658	136	3	1971	0	2	1	1	1	1	0	1	0	1	0	0	0	0	0	0	0	0	0	0	1	1	0
84	LASERS IN MEDICAL SCIENCE	LASER MED SCI	0268-8921	2.076	0.317	4784	3.68	234	2	1986	0	2	1	1	1	1	1	1	0	1	1	1	1	1	1	1	1	1	1	1	1	1	0
85	Visceral Medicine	VISC MED	2297-4725	1.989	0.299	309	2.49	56	1	2016	0	5	1	1	1	1	1	0	0	0	1	0	0	0	0	0	0	0	0	0	1	1	0
86	ARCHIVES OF ORTHOPAEDIC AND TRAUMA SURGERY	ARCH ORTHOP TRAUM SU	0936-8051	1.973	0.295	6184	3.791	207	1	1989	0	2	1	1	1	1	1	1	0	1	1	1	1	1	1	1	1	1	1	1	1	1	0
87	World Journal of Surgical Oncology	WORLD J SURG ONCOL	1477-7819	1.966	0.294	4587	3.662	238	2	2003	0	5	1	1	1	1	1	1	0	1	1	1	1	1	1	1	0	0	0	0	1	1	0
88	INTERNATIONAL JOURNAL OF ORAL AND MAXILLOFACIAL SURGERY	INT J ORAL MAX SURG	0901-5027	1.961	0.292	7862	3.896	225	2	1972	0	5	1	0	1	1	0	0	0	1	0	0	0	0	0	0	0	0	0	0	1	1	0
89	SURGICAL CLINICS OF NORTH AMERICA	SURG CLIN N AM	0039-6109	1.959	0.292	3335	3.523	91	0	1920	0	1	1	0	0	0	0	0	0	0	0	0	0	0	0	0	0	0	0	0	1	0	0
90	MICROSURGERY	MICROSURG	0738-1085	1.945	0.289	3063	3.486	112	0	1983	0	4	0	0	0	0	0	0	0	0	0	0	0	0	0	0	0	0	0	0	1	0	0
91	JOURNAL OF CRANIO-MAXILLOFACIAL SURGERY	J CRANIO MAXILL SURG	1010-5182	1.942	0.288	5649	3.752	313	2	1973	0	5	1	0	1	0	1	0	0	0	0	0	0	0	0	0	0	0	0	0	1	1	0
92	Interactive Cardiovascular and Thoracic Surgery	INTERACT CARDIOV TH	1569-9293	1.931	0.286	5544	3.744	300	2	2002	0	5	1	1	1	1	0	1	1	1	0	0	0	0	0	0	0	0	0	0	1	1	0
93	Surgical Infections	SURG INFECT	1096-2964	1.921	0.284	2018	3.305	114	0	2000	0	5	1	0	0	0	0	0	0	0	0	0	0	0	0	0	0	0	0	0	1	0	0
94	PHOTOMEDICINE AND LASER SURGERY	PHOTOMED LASER SURG	1549-5418	1.913	0.282	2655	3.424	84	0	2004	0	5	1	0	0	0	0	0	0	0	0	0	0	0	0	0	0	0	0	0	1	0	0
95	STEREOTACTIC AND FUNCTIONAL NEUROSURGERY	STEREOT FUNCT NEUROS	1011-6125	1.905	0.28	1807	3.257	51	1	1983	0	5	1	1	1	0	1	0	0	0	1	0	0	0	0	0	0	0	0	0	1	1	0
96	DIGESTIVE SURGERY	DIGEST SURG	0253-4886	1.884	0.275	2076	3.317	66	1	1984	0	5	1	1	1	0	1	0	0	0	0	0	0	0	0	0	0	0	0	0	1	1	0
97	Journal of Neurosurgical Sciences	J NEUROSURG SCI	0390-5616	1.883	0.275	833	2.921	73	1	1957	0	5	1	0	1	1	0	0	0	0	0	0	0	0	0	0	0	0	0	0	1	0	0
98	SURGEON-JOURNAL OF THE ROYAL COLLEGES OF SURGEONS OF EDINBURGH AND IRELAND	SURG-J R COLL SURG E	1479-666X	1.874	0.273	1261	3.101	55	2	2003	0	5	1	0	1	0	1	0	0	0	0	0	0	0	0	0	0	0	0	0	1	1	0
99	JOURNAL OF SURGICAL RESEARCH	J SURG RES	0022-4804	1.872	0.272	13406	4.127	490	0	1961	0	1	1	0	0	0	1	0	0	0	0	0	0	0	0	0	0	0	0	0	1	0	0
100	JOURNAL OF RECONSTRUCTIVE MICROSURGERY	J RECONSTR MICROSURG	0743-684X	1.837	0.264	2190	3.34	97	0	1984	0	5	1	0	0	0	0	0	0	0	0	0	0	0	0	0	0	0	0	0	1	0	0
101	ACTA NEUROCHIRURGICA	ACTA NEUROCHIR	0001-6268	1.834	0.263	9486	3.977	298	1	1950	0	2	1	1	1	1	1	1	0	1	1	1	1	1	1	1	1	1	1	1	1	1	0
102	INJURY-INTERNATIONAL JOURNAL OF THE CARE OF THE INJURED	INJURY	0020-1383	1.834	0.263	14027	4.147	407	2	1969	0	1	1	0	1	0	0	0	0	0	0	0	0	0	0	0	0	0	0	0	1	1	0
103	BMC Surgery	BMC SURG	1471-2482	1.775	0.249	1621	3.21	113	2	2001	0	5	1	1	1	1	1	1	0	1	1	1	1	1	1	1	0	0	0	0	1	1	1
104	Thoracic Surgery Clinics	THORAC SURG CLIN	1547-4127	1.763	0.246	917	2.962	64	0	1991	0	1	1	0	0	0	0	0	0	0	0	0	0	0	0	0	0	0	0	0	1	0	0
105	KNEE	KNEE	0968-0160	1.762	0.246	4176	3.621	163	1	1994	0	1	1	0	1	1	0	0	0	1	0	0	0	0	0	0	0	0	0	0	1	1	0
106	World Neurosurgery	WORLD NEUROSURG	1878-8750	1.723	0.236	10159	4.007	2308	0	2010	0	1	0	0	0	0	1	0	0	0	0	0	0	0	0	0	0	0	0	0	1	0	0
107	CLINICAL NEUROLOGY AND NEUROSURGERY	CLIN NEUROL NEUROSUR	0303-8467	1.672	0.223	5855	3.768	377	1	1974	0	1	0	0	0	0	1	0	0	0	0	0	0	0	0	0	0	0	0	0	1	0	0
108	CLINICAL TRANSPLANTATION	CLIN TRANSPLANT	0902-0063	1.667	0.222	4575	3.66	266	1	1974	0	4	0	0	0	0	0	0	0	0	0	0	0	0	0	0	0	0	0	0	1	0	0
109	JSLS-Journal of the Society of Laparoendoscopic Surgeons	JSLS-J SOC LAPAROEND	1086-8089	1.654	0.219	1897	3.278	53	0	1997	0	5	1	0	1	0	0	0	0	0	0	0	0	0	0	0	0	0	0	0	1	0	0
110	NEUROLOGIA MEDICO-CHIRURGICA	NEUROL MED-CHIR	0470-8105	1.651	0.218	3018	3.48	66	3	1959	0	5	1	0	0	1	0	0	0	0	0	0	0	0	0	0	0	0	0	0	1	1	0
111	JOURNAL OF INVESTIGATIVE SURGERY	J INVEST SURG	0894-1939	1.642	0.215	936	2.971	57	0	1988	0	5	1	0	0	0	0	0	0	0	0	0	0	0	0	0	0	0	0	0	1	1	0
112	International Journal of Medical Robotics and Computer Assisted Surgery	INT J MED ROBOT COMP	1478-5951	1.634	0.213	1520	3.182	92	2	2005	0	4	1	0	0	0	0	0	0	0	0	0	0	0	0	0	0	0	0	0	1	0	0
113	EUROPEAN SURGICAL RESEARCH	EUR SURG RES	0014-312X	1.629	0.212	1053	3.022	29	1	1969	0	5	1	1	1	1	1	0	0	0	0	0	0	0	0	0	0	0	0	0	1	1	0
114	Clinics in Colon and Rectal Surgery	CLIN COLON RECT SURG	1531-0043	1.617	0.209	1064	3.027	50	0	2001	0	5	0	0	0	0	0	0	0	0	0	0	0	0	0	0	0	0	0	0	0	0	0
115	ANZ JOURNAL OF SURGERY	ANZ J SURG	1445-1433	1.605	0.205	4120	3.615	324	1	1928	0	4	1	0	1	1	0	0	1	0	0	0	0	0	0	0	0	0	0	0	1	1	0
116	Orthopaedics & Traumatology-Surgery & Research	ORTHOP TRAUMATOL-SUR	1877-0568	1.572	0.196	3429	3.535	232	1	2009	0	1	1	0	1	1	0	0	0	1	0	0	0	0	0	0	0	0	0	0	1	1	1
117	Seminars in Vascular Surgery	SEMIN VASC SURG	0895-7967	1.568	0.195	750	2.875	11	0	1988	0	1	0	0	0	0	0	0	0	0	0	0	0	0	0	0	0	0	0	0	1	0	0
118	Asian Journal of Surgery	ASIAN J SURG	1015-9584	1.56	0.193	804	2.905	85	3	1978	0	1	1	0	1	0	1	0	0	0	0	0	0	0	0	0	0	0	0	0	1	1	0
119	Journal of Burn Care & Research	J BURN CARE RES	1559-047X	1.538	0.187	2763	3.441	153	0	1980	0	5	1	0	0	0	0	0	0	0	0	0	0	0	0	0	0	0	0	0	1	1	0
120	Scandinavian Journal of Surgery	SCAND J SURG	1457-4969	1.533	0.186	903	2.956	51	1	1919	0	5	1	0	1	0	0	0	0	0	0	0	0	0	0	0	0	0	0	0	0	1	0
121	Journal of Hand Therapy	J HAND THER	0894-1130	1.532	0.185	1681	3.226	60	0	1987	0	1	1	1	1	1	0	1	0	1	1	0	0	0	0	0	0	0	0	0	1	1	1
122	BRITISH JOURNAL OF NEUROSURGERY	BRIT J NEUROSURG	0268-8697	1.481	0.171	3247	3.511	119	2	1987	0	5	1	0	0	0	0	0	0	0	0	0	0	0	0	0	0	0	0	0	1	1	0
123	Surgical Innovation	SURG INNOV	1553-3506	1.472	0.168	1111	3.046	82	0	2004	0	5	1	1	1	0	0	0	0	0	0	0	0	0	0	0	0	0	0	0	0	1	0
124	CLEFT PALATE-CRANIOFACIAL JOURNAL	CLEFT PALATE-CRAN J	1055-6656	1.471	0.168	4473	3.651	192	0	1991	0	5	1	1	1	0	0	0	0	0	0	0	0	0	0	0	0	0	0	0	0	1	0
125	ANNALS OF PLASTIC SURGERY	ANN PLAS SURG	0148-7043	1.448	0.161	8403	3.924	253	0	1978	0	3	1	1	0	0	0	0	0	0	0	0	0	0	0	0	0	0	0	0	1	1	0
126	Ophthalmic Surgery Lasers & Imaging Retina	OSLI RETINA	2325-8160	1.422	0.153	2754	3.44	186	0	2013	0	5	1	0	0	0	0	0	0	0	0	0	0	0	0	0	0	0	0	0	1	1	0
127	AESTHETIC PLASTIC SURGERY	AESTHET PLAST SURG	0364-216X	1.399	0.146	3604	3.557	190	0	1976	0	2	0	0	0	0	0	0	0	0	0	0	0	0	0	0	0	0	0	0	1	0	0
128	PEDIATRIC SURGERY INTERNATIONAL	PEDIATR SURG INT	0179-0358	1.397	0.145	3884	3.589	181	1	1986	0	2	1	1	1	1	1	1	0	1	1	1	1	1	1	1	1	1	1	1	1	1	0
129	Annals of Transplantation	ANN TRANSPL	1425-9524	1.369	0.136	1067	3.028	102	1	1996	0	5	1	1	0	0	0	0	0	0	0	0	0	0	0	0	0	0	0	0	1	0	0
130	Advances in Skin & Wound Care	ADV SKIN WOUND CARE	1527-7941	1.355	0.132	1193	3.077	57	0	1988	0	3	1	0	0	0	0	0	0	0	0	0	0	0	0	0	0	0	0	0	1	1	0
131	SURGICAL LAPAROSCOPY ENDOSCOPY & PERCUTANEOUS TECHNIQUES	SURG LAPARO ENDO PER	1530-4515	1.345	0.129	2576	3.411	99	0	1991	0	3	1	0	0	0	0	0	0	0	0	0	0	0	0	0	0	0	0	0	1	0	0
132	FACIAL PLASTIC SURGERY	FACIAL PLAST SURG	0736-6825	1.329	0.124	1124	3.051	89	0	1983	0	5	1	0	0	0	0	0	0	0	0	0	0	0	0	0	0	0	0	0	1	0	0
133	CHILDS NERVOUS SYSTEM	CHILD NERV SYST	0256-7040	1.327	0.123	5817	3.765	283	1	1985	0	2	1	1	1	1	1	1	0	1	1	1	1	1	1	1	1	1	1	1	1	1	0
134	Journal of Laparoendoscopic & Advanced Surgical Techniques	J LAPAROENDOSC ADV S	1092-6429	1.322	0.121	2814	3.449	223	0	1997	0	5	0	0	0	0	0	0	0	0	0	0	0	0	0	0	0	0	0	0	0	0	0
135	International Journal of Lower Extremity Wounds	INT J LOW EXTR WOUND	1534-7346	1.277	0.106	776	2.89	40	0	2002	0	5	1	1	1	0	0	0	0	0	0	0	0	0	0	0	0	0	0	0	0	1	0
136	Journal of Neurological Surgery Part B-Skull Base	J NEUROL SURG PART B	2193-6331	1.216	0.085	669	2.825	140	0	2012	0	5	1	0	0	0	0	0	0	0	0	0	0	0	0	0	0	0	0	0	1	0	0
137	CLINICS IN PLASTIC SURGERY	CLIN PLAST SURG	0094-1298	1.215	0.085	2290	3.36	59	0	1974	0	1	1	0	0	0	0	0	0	0	0	0	0	0	0	0	0	0	0	0	1	0	0
138	Journal of Korean Neurosurgical Society	J KOREAN NEUROSURG S	2005-3711	1.187	0.074	1991	3.299	90	3	2003	0	5	1	0	0	0	0	0	0	0	0	0	0	0	0	0	0	0	0	0	1	1	0
139	Annals of Surgical Treatment and Research	ANN SURG TREAT RES	2288-6575	1.181	0.072	616	2.79	98	3	2013	0	5	1	0	0	0	0	0	0	0	0	0	0	0	0	0	0	0	0	0	1	1	0
140	ANNALS OF VASCULAR SURGERY	ANN VASC SURG	0890-5096	1.179	0.072	4813	3.682	453	0	1986	0	1	1	0	0	0	0	0	0	0	0	0	0	0	0	0	0	0	0	0	1	0	0
141	BRITISH JOURNAL OF ORAL & MAXILLOFACIAL SURGERY	BRIT J ORAL MAX SURG	0266-4356	1.164	0.066	4444	3.648	187	2	1984	0	5	1	0	1	0	1	0	0	0	0	0	0	0	0	0	0	0	0	0	1	1	0
142	Facial Plastic Surgery Clinics of North America	FACIAL PLAST SURG CL	1064-7406	1.157	0.063	710	2.851	42	0	1993	0	1	1	0	0	0	1	0	0	0	0	0	0	0	0	0	0	0	0	0	1	0	0
143	MINIMALLY INVASIVE THERAPY & ALLIED TECHNOLOGIES	MINIM INVASIV THER	1364-5706	1.154	0.062	782	2.893	52	1	1996	0	5	0	0	0	0	0	0	0	0	0	0	0	0	0	0	0	0	0	0	1	0	0
144	THORACIC AND CARDIOVASCULAR SURGEON	THORAC CARDIOV SURG	0171-6425	1.152	0.061	1805	3.256	108	1	1979	0	5	1	0	1	1	1	0	0	0	0	0	0	0	0	0	0	0	0	0	1	1	0
145	Videosurgery and Other Miniinvasive Techniques	VIDEOSURGERY MINIINV	1895-4588	1.147	0.06	496	2.695	80	1	2006	0	5	1	0	0	0	0	0	0	0	0	0	0	0	0	0	0	0	0	0	1	0	0
146	OPHTHALMIC PLASTIC AND RECONSTRUCTIVE SURGERY	OPHTHAL PLAST RECONS	0740-9303	1.134	0.055	3026	3.481	195	0	1985	0	3	1	0	0	0	0	0	0	0	0	0	0	0	0	0	0	0	0	0	1	0	0
147	Annals of Thoracic and Cardiovascular Surgery	ANN THORAC CARDIOVAS	1341-1098	1.109	0.045	1154	3.062	50	3	1995	0	5	0	0	0	0	0	0	0	0	0	0	0	0	0	0	0	0	0	0	1	0	0
148	SEMINARS IN CUTANEOUS MEDICINE AND SURGERY	SEMIN CUTAN MED SURG	1085-5629	1.067	0.028	983	2.993	46	0	1996	0	5	1	0	0	0	0	0	0	0	0	0	0	0	0	0	0	0	0	0	1	0	0
149	JOURNAL OF CARDIOVASCULAR SURGERY	J CARDIOVASC SURG	0021-9509	1.062	0.026	1835	3.264	92	1	1960	0	5	1	0	1	1	0	0	0	0	1	0	0	0	0	0	0	0	0	0	1	0	0
150	Journal of Neurological Surgery Part A-Central European Neurosurgery	J NEUROL SURG PART A	2193-6315	1.06	0.025	510	2.708	87	0	2012	0	5	1	0	0	0	0	0	0	0	1	0	0	0	0	0	0	0	0	0	1	0	0
151	Eklem Hastaliklari ve Cerrahisi-Joint Diseases and Related Surgery	EKLEM HAST CERRAHISI	1305-8282	1.058	0.024	242	2.384	31	3	1990	1	5	1	0	0	0	0	0	0	0	1	0	0	0	0	0	0	0	0	0	1	0	0
152	SURGICAL AND RADIOLOGIC ANATOMY	SURG RADIOL ANAT	0930-1038	1.039	0.017	3148	3.498	182	1	1978	0	2	1	1	1	1	1	1	0	1	1	1	1	1	1	1	1	1	1	1	1	1	0
153	Journal of Plastic Surgery and Hand Surgery	J PLAST SURG HAND SU	2000-656X	1.037	0.016	647	2.811	61	1	1967	0	5	0	0	0	0	0	0	0	0	1	0	0	0	0	0	0	0	0	0	1	0	0
154	Journal of Foot & Ankle Surgery	J FOOT ANKLE SURG	1067-2516	1.014	0.006	3100	3.491	238	0	1993	0	1	1	0	1	0	1	0	0	0	0	0	0	0	0	0	0	0	0	0	1	0	0
155	INTERNATIONAL JOURNAL OF SURGICAL PATHOLOGY	INT J SURG PATHOL	1066-8969	0.975	-0.011	1359	3.133	120	0	1996	0	5	1	1	1	0	0	0	0	0	0	0	0	0	0	0	0	0	0	0	0	1	0
156	Journal of Minimal Access Surgery	J MINIM ACCESS SURG	0972-9941	0.966	-0.015	534	2.728	71	3	2005	0	5	1	0	1	0	0	0	0	0	0	0	0	0	0	0	0	0	0	0	1	0	0
157	TRANSPLANTATION PROCEEDINGS	TRANSPL P	0041-1345	0.959	-0.018	12748	4.105	799	0	1969	0	1	1	0	0	0	1	0	0	0	0	0	0	0	0	0	0	0	0	0	1	0	0
158	Progress in Transplantation	PROG TRANSPLANT	1526-9248	0.958	-0.019	812	2.91	62	0	2000	0	5	1	1	1	0	0	0	0	0	0	0	0	0	0	0	0	0	0	0	1	1	0
159	Journal of Orthopaedic Surgery	J ORTHOP SURG-HONG K	1022-5536	0.957	-0.019	1150	3.061	149	2	1962	0	5	1	1	1	0	0	0	0	0	0	0	0	0	0	0	0	0	0	0	1	1	0
160	Journal of Cosmetic and Laser Therapy	J COSMET LASER THER	1476-4172	0.95	-0.022	830	2.919	84	1	2001	0	5	1	0	0	0	0	0	0	0	0	0	0	0	0	0	0	0	0	0	1	1	0
161	NEUROCHIRURGIE	NEUROCHIRURGIE	0028-3770	0.948	-0.023	849	2.929	66	1	1955	1	5	1	0	1	0	1	0	0	0	0	0	0	0	0	0	0	0	0	0	1	1	0
162	Acta Cirurgica Brasileira	ACTA CIR BRAS	0102-8650	0.931	-0.031	1264	3.102	118	0	1986	0	5	1	0	1	1	1	0	0	0	0	0	0	0	0	0	0	0	0	0	1	1	0
163	Turkish Neurosurgery	TURK NEUROSURG	1019-5149	0.896	-0.048	1271	3.104	149	3	1990	0	5	0	0	1	1	1	0	0	0	0	0	0	0	0	0	0	0	0	0	1	0	0
164	Vascular and Endovascular Surgery	VASC ENDOVASC SURG	1538-5744	0.859	-0.066	1161	3.065	116	0	1967	0	5	1	1	1	0	0	0	0	0	0	0	0	0	0	0	0	0	0	0	1	1	0
165	CIRUGIA ESPANOLA	CIR ESPAN	0009-739X	0.835	-0.078	784	2.894	64	1	1946	1	1	1	0	1	1	1	0	0	0	0	0	0	0	0	0	0	0	0	0	1	1	0
166	Handchirurgie Mikrochirurgie Plastische Chirurgie	HANDCHIR MIKROCHIR P	0722-1819	0.809	-0.092	609	2.785	49	1	1969	1	5	0	0	0	0	0	0	0	0	0	0	0	0	0	0	0	0	0	0	1	0	0
167	Brazilian Journal of Cardiovascular Surgery	BRAZ J CARDIOV SURG	0102-7638	0.796	-0.099	740	2.869	90	0	1986	0	5	1	1	1	1	1	1	0	1	1	0	1	1	1	0	1	0	1	1	1	1	0
168	Annali Italiani di Chirurgia	ANN ITAL CHIR	0003-469X	0.793	-0.101	657	2.818	91	1	1922	0	5	1	0	0	0	0	0	0	0	0	0	0	0	0	0	0	0	0	0	0	0	0
169	JOURNAL OF CRANIOFACIAL SURGERY	J CRANIOFAC SURG	1049-2275	0.785	-0.105	7580	3.88	683	0	1990	0	3	0	0	0	0	0	0	0	0	0	0	0	0	0	0	0	0	0	0	1	0	0
170	PEDIATRIC NEUROSURGERY	PEDIATR NEUROSURG	1016-2291	0.783	-0.106	2001	3.301	66	1	1991	0	5	1	1	1	0	1	0	0	0	1	0	0	0	0	0	0	0	0	0	1	1	0
171	MINERVA CHIRURGICA	MINERVA CHIR	0026-4733	0.736	-0.133	535	2.728	62	1	1946	0	5	1	0	1	1	0	0	0	0	1	0	0	0	0	0	0	0	0	0	1	0	0
172	UNFALLCHIRURG	UNFALLCHIRURG	0177-5537	0.716	-0.145	1472	3.168	118	1	1894	1	2	1	0	0	0	0	0	0	0	0	0	0	0	0	0	0	0	0	0	1	0	0
173	CHIRURG	CHIRURG	0009-4722	0.669	-0.175	1229	3.09	127	1	1930	0	2	1	0	0	0	0	0	0	0	0	0	0	0	0	0	0	0	0	0	1	0	0
174	Plastic Surgery	PLAST SURG-CHIR PLAS	2292-5503	0.667	-0.176	144	2.158	33	0	2014	1	5	1	1	1	0	0	0	0	0	0	0	0	0	0	0	0	0	0	0	1	1	0
175	ZENTRALBLATT FUR CHIRURGIE	ZBL CHIR	0044-409X	0.623	-0.206	748	2.874	57	1	1874	1	5	0	0	0	0	0	0	0	0	0	0	0	0	0	0	0	0	0	0	1	0	0
176	AMERICAN SURGEON	AM SURGEON	0003-1348	0.61	-0.215	6166	3.79	552	0	1951	0	5	0	0	0	0	0	0	0	0	0	0	0	0	0	0	0	0	0	0	0	0	0
177	SOUTH AFRICAN JOURNAL OF SURGERY	S AFR J SURG	0038-2361	0.584	-0.234	312	2.494	61	3	1963	1	5	1	0	0	0	0	0	0	0	0	0	0	0	0	0	0	0	0	0	1	0	0
178	Computer Assisted Surgery	COMPUT ASSIST SURG	2469-9322	0.581	-0.236	54	1.732	7	2	2016	0	5	1	0	0	0	0	0	0	0	0	0	0	0	0	0	0	0	0	0	1	1	0
179	Hand Surgery & Rehabilitation	HAND SURG REHABIL	2468-1229	0.571	-0.243	93	1.968	63	1	2016	1	1	1	0	0	0	0	0	0	0	0	0	0	0	0	0	0	0	0	0	1	0	0
180	HEART SURGERY FORUM	HEART SURG FORUM	1098-3511	0.564	-0.249	534	2.728	95	0	1998	0	5	0	0	0	0	0	0	0	0	0	0	0	0	0	0	0	0	0	0	1	0	0
181	Seminars in Plastic Surgery	SEMIN PLAST SURG	1535-2188	0.561	-0.251	716	2.855	31	0	2002	0	5	1	0	0	0	0	0	0	0	0	0	0	0	0	0	0	0	0	0	1	0	0
182	Indian Journal of Surgery	INDIAN J SURG	0972-2068	0.55	-0.26	984	2.993	108	3	1938	0	2	1	0	0	0	1	0	0	0	1	1	1	1	1	1	1	1	1	1	1	0	0
183	ACTA CHIRURGICA BELGICA	ACTA CHIR BELG	0001-5458	0.521	-0.283	918	2.963	66	1	1946	1	5	1	0	1	1	0	0	0	1	0	0	0	0	0	0	0	0	0	0	1	1	1
184	NEUROCIRUGIA	NEUROCIRUGIA	1130-1473	0.519	-0.285	296	2.471	40	1	1961	1	1	1	0	0	0	0	0	0	0	0	0	0	0	0	0	0	0	0	0	1	0	0
185	European Surgery-Acta Chirurgica Austriaca	EUR SURG	1682-8631	0.483	-0.316	203	2.307	43	1	1968	0	2	1	0	0	0	0	0	0	0	0	0	0	0	0	0	0	0	0	0	1	0	0
186	CESKA A SLOVENSKA NEUROLOGIE A NEUROCHIRURGIE	CESK SLOV NEUROL N	1210-7859	0.355	-0.45	223	2.348	85	1	1993	1	5	1	0	0	0	0	0	0	0	0	0	0	0	0	0	0	0	0	0	1	1	0
187	Turk Gogus Kalp Damar Cerrahisi Dergisi-Turkish Journal of Thoracic and Cardiovascular Surgery	TURK GOGUS KALP DAMA	1301-5680	0.19	-0.721	251	2.4	104	3	1999	1	5	1	0	1	1	0	1	0	1	0	0	0	0	0	0	0	0	0	0	1	0	0
188	INTERNATIONAL SURGERY	INT SURG	0020-8868	0.114	-0.943	1187	3.074	16	0	1966	0	5	1	1	0	0	0	0	0	0	0	0	0	0	0	0	0	0	0	0	1	0	0
