# Supplementary material for: The relationship between endorsing reporting guidelines or trial registration and the impact factor or total citations in surgical journals
Source: PeerJ. 2022 Jan 25;10:e12837. doi: 10.7717/peerj.12837 (PMC8796708; doi:10.7717/peerj.12837)
Supplement: Supplemental Information 2 [file peerj-10-12837-s002.xlsx]

## Sheet: Sheet1
NO	JOURNAL_full	JOURNAL_abbr	ISSN	Reasons for Exclusion
1	Hepatobiliary Surgery and Nutrition	HEPATOBIL SURG NUTR	2304-3881	Journals’ data not available
2	Annals of Cardiothoracic Surgery	ANN CARDIOTHORAC SUR	2225-319X	Journals’ data not available
3	Burns & Trauma	BURNS TRAUMA	2321-3868	Journals’ data not available
4	Updates in Surgery	UPDATES SURG	2038-131X	Journals’ data not available
5	Gland Surgery	GLAND SURG	2227-684X	Journals’ data not available
6	Operative Neurosurgery	OPER NEUROSURG	2332-4252	Journals’ data not available
7	General Thoracic and Cardiovascular Surgery	GEN THORAC CARDIOVAS	1863-6705	Journals’ data not available
8	Cirugia y Cirujanos	CIR CIR	0009-7411	Journals’ data not available
9	CURRENT PROBLEMS IN SURGERY	CURR PROB SURG	0011-3840	Review journals not publishing original research
10	WOUNDS-A COMPENDIUM OF CLINICAL RESEARCH AND PRACTICE	WOUNDS	1044-7946	Journals’ instructions for authors not available
11	Ostomy Wound Management	OSTOMY WOUND MANAG	0889-5899	Journals’ instructions for authors not available
12	ANNALS OF THE ROYAL COLLEGE OF SURGEONS OF ENGLAND	ANN ROY COLL SURG	0035-8843	Journals’ instructions for authors not available
13	EUROPEAN JOURNAL OF PEDIATRIC SURGERY	EUR J PEDIATR SURG	0939-7248	Journals’ instructions for authors not available
14	Annales de Chirurgie Plastique Esthetique	ANN CHIR PLAST ESTH	0294-1260	Journals’ instructions for authors not available
15	OPERATIVE TECHNIQUES IN SPORTS MEDICINE	OPER TECHN SPORT MED	1060-1872	Journals’ instructions for authors not available
